# Supplementary material for: Genome-wide identification of the MIOX gene family and their expression profile in cotton development and response to abiotic stress
Source: PubMed Central journal article supplement (PMC8270170; doi:10.1371/journal.pone.0254111), 2021-07-09
Supplement: pone.0254111.s001.pdf [file pone.0254111.s001.pdf]

GdMIOX01 .....  
GtMIOX01 .....  
GbMIOX01 .....  
GaMIOX01 .....  
GkkMIOX01 .....  
GhMIOX01 .....  
GmMIOX01 .....  
GherMIOX01 .....  
GbMIOX07 .....  
GtMIOX06 .....  
GrMIOX01 .....  
GhMIOX07 .....  
GdMIOX06 .....  
GmMIOX06 .....  
GmMIOX05 .....  
GtMIOX05 .....  
GdMIOX05 .....  
GaMIOX05 .....  
GbMIOX06 .....  
GhMIOX06 .....  
GhMIOX12 .....  
GtMIOX11 .....  
GbMIOX12 .....  
GrMIOX03 .....  
GherMIOX06 .....  
GdMIOX11 .....  
GmMIOX11 .....  
GkkMIOX05 .....  
ATMIOX03 .....  
ATMIOX04 .....  
GaMIOX03 .....  
GdMIOX03 .....  
GherMIOX03 .....  
GbMIOX03 .....  
GtMIOX03 .....  
GhMIOX03 .....  
GmMIOX03 .....  
GkkMIOX03 .....  
GtMIOX08 .....  
GbMIOX09 .....  
GdMIOX08 .....  
GhMIOX09 .....  
GrMIOX05 .....  
GmMIOX08 .....  
ATMIOX02 .....  
GherMIOX04 .....  
GhMIOX04 .....  
GaMIOX04 .....  
GbMIOX04 .....  
GtMIOX04 .....  
GmMIOX04 .....  
GdMIOX09 .....  
GtMIOX09 .....  
GbMIOX10 .....  
GhMIOX10 .....  
GmMIOX09 .....  
GrMIOX06 .....  
GdMIOX04 .....  
GkkMIOX04 .....  
GhMIOX02 .....  
GtMIOX02 .....  
GbMIOX02 .....  
GmMIOX02 .....  
GaMIOX02 .....  
GhMIOX08 .....  
GrMIOX04 .....  
GbMIOX08 .....  
GdMIOX07 .....  
GtMIOX07 .....  
GmMIOX07 .....  
GherMIOX02 .....  
GkkMIOX02 .....  
GdMIOX02 .....  
ATMIOX01 .....  
GaMIOX06 .....  
GhMIOX05 .....  
GbMIOX11 .....  
GdMIOX10 .....  
GtMIOX10 .....  
GrMIOX02 .....  
GhMIOX11 .....  
GmMIOX10 .....  
GbMIOX05 .....  
GherMIOX05 MEGYRVDEAVIALKLDASNWWHDINESTLWQDRIFHILAALYGLVAAVALVQLIRIQLR  
GkkMIOX06 .....

GdMIOX01 .....  
GtMIOX01 .....  
GbMIOX01 .....  
GaMIOX01 .....  
GkkMIOX01 .....  
GhMIOX01 .....  
GmMIOX01 .....  
GherMIOX01 .....  
GbMIOX07 .....  
GtMIOX06 .....  
GrMIOX01 .....  
GhMIOX07 .....  
GdMIOX06 .....  
GmMIOX06 .....  
GmMIOX05 .....  
GtMIOX05 .....  
GdMIOX05 .....  
GaMIOX05 .....  
GbMIOX06 .....  
GhMIOX06 .....  
GhMIOX12 .....  
GtMIOX11 .....  
GbMIOX12 .....  
GrMIOX03 .....  
GherMIOX06 .....  
GdMIOX11 .....  
GmMIOX11 .....  
GkkMIOX05 .....  
ATMIOX03 .....  
ATMIOX04 .....  
GaMIOX03 .....  
GdMIOX03 .....  
GherMIOX03 .....  
GbMIOX03 .....  
GtMIOX03 .....  
GhMIOX03 .....  
GmMIOX03 .....  
GkkMIOX03 .....  
GtMIOX08 .....  
GbMIOX09 .....  
GdMIOX08 .....  
GhMIOX09 .....  
GrMIOX05 .....  
GmMIOX08 .....  
ATMIOX02 .....  
GherMIOX04 .....  
GhMIOX04 .....  
GaMIOX04 .....  
GbMIOX04 .....  
GtMIOX04 .....  
GmMIOX04 .....  
GdMIOX09 .....  
GtMIOX09 .....  
GbMIOX10 .....  
GhMIOX10 .....  
GmMIOX09 .....  
GrMIOX06 .....  
GdMIOX04 .....  
GkkMIOX04 .....  
GhMIOX02 .....  
GtMIOX02 .....  
GbMIOX02 .....  
GmMIOX02 .....  
GaMIOX02 .....  
GhMIOX08 .....  
GrMIOX04 .....  
GbMIOX08 .....  
GdMIOX07 .....  
GtMIOX07 .....  
GmMIOX07 .....  
GherMIOX02 .....  
GkkMIOX02 .....  
GdMIOX02 .....  
ATMIOX01 .....  
GaMIOX06 .....  
GhMIOX05 .....  
GbMIOX11 .....  
GdMIOX10 .....  
GtMIOX10 .....  
GrMIOX02 .....  
GhMIOX11 .....  
GmMIOX10 .....  
GbMIOX05 .....  
GherMIOX05 VPEYGWTTQKVFHFLNFLVNGVRGLVVFRRDQNLHPEIVQHILLDMPSLAFFTTYALL  
GkkMIOX06 .....

GdMIOX01 .....  
GtMIOX01 .....  
GbMIOX01 .....  
GaMIOX01 .....  
GkkMIOX01 .....  
GhMIOX01 .....  
GmMIOX01 .....  
GherMIOX01 .....  
GbMIOX07 .....  
GtMIOX06 .....  
GrMIOX01 .....  
GhMIOX07 .....  
GdMIOX06 .....  
GmMIOX06 .....  
GmMIOX05 .....  
GtMIOX05 .....  
GdMIOX05 .....  
GaMIOX05 .....  
GbMIOX06 .....  
GhMIOX06 .....  
GhMIOX12 .....  
GtMIOX11 .....  
GbMIOX12 .....  
GrMIOX03 .....  
GherMIOX06 .....  
GdMIOX11 .....  
GmMIOX11 .....  
GkkMIOX05 .....  
ATMIOX03 .....  
ATMIOX04 .....  
GaMIOX03 .....  
GdMIOX03 .....  
GherMIOX03 .....  
GbMIOX03 .....  
GtMIOX03 .....  
GhMIOX03 .....  
GmMIOX03 .....  
GkkMIOX03 .....  
GtMIOX08 .....  
GbMIOX09 .....  
GdMIOX08 .....  
GhMIOX09 .....  
GrMIOX05 .....  
GmMIOX08 .....  
ATMIOX02 .....  
GherMIOX04 .....  
GhMIOX04 .....  
GaMIOX04 .....  
GbMIOX04 .....  
GtMIOX04 .....  
GmMIOX04 .....  
GdMIOX09 .....  
GtMIOX09 .....  
GbMIOX10 .....  
GhMIOX10 .....  
GmMIOX09 .....  
GrMIOX06 .....  
GdMIOX04 .....  
GkkMIOX04 .....  
GhMIOX02 .....  
GtMIOX02 .....  
GbMIOX02 .....  
GmMIOX02 .....  
GaMIOX02 .....  
GhMIOX08 .....  
GrMIOX04 .....  
GbMIOX08 .....  
GdMIOX07 .....  
GtMIOX07 .....  
GmMIOX07 .....  
GherMIOX02 .....  
GkkMIOX02 .....  
GdMIOX02 .....  
ATMIOX01 .....  
GaMIOX06 ..... MTILIDQP .....  
GhMIOX05 ..... MTILIDQPDFGEFLFVSSINDLVL .....  
GbMIOX11 .....  
GdMIOX10 ..... MTILIDQP .....  
GtMIOX10 ..... MTILIDQP .....  
GrMIOX02 ..... MTILIDQP .....  
GhMIOX11 ..... MTILIDQP .....  
GmMIOX10 ..... MILFFFD .....  
GbMIOX05 .....  
GherMIOX05 VLFWAEIYYQARAVSTDGLRPSFFTINAVVYTIQIGMWLILWVKYIPVLVVLVLSKVFFAGV .....  
GkkMIOX06 .....

|            | 1                                                             | 10                                   | 20    |
|------------|---------------------------------------------------------------|--------------------------------------|-------|
| GdMIOX01   | .....                                                         | MVTICIGKVDQAKGQKIQLD                 | ..... |
| GtMIOX01   | .....                                                         | MVTICIGKVDQAKGQKIQLD                 | ..... |
| GbMIOX01   | ..                                                            | MSFSFFFFRFRILQHFYDEGPIDQAKGQKIQLD    | ..... |
| GaMIOX01   | ..                                                            | MSFSFFFFRFRILQHFYDGGPIDQAKGQKIQLD    | ..... |
| GkkMIOX01  | .....                                                         | MSFTWCLVDQAKGQKIQVD                  | ..... |
| GhMIOX01   | .....                                                         | MVTICIGKVDQAKGQKIQLD                 | ..... |
| GmMIOX01   | .....                                                         | MVTICIGKVDQAKGQKIQLD                 | ..... |
| GherMIOX01 | .....                                                         | MVTICIGKVDQAKGQKIQLD                 | ..... |
| GbMIOX07   | .....                                                         | MVTICIGKVGQAKGQKIQLD                 | ..... |
| GtMIOX06   | .....                                                         | MVTICIGKVGQAKGQKIQLD                 | ..... |
| GrMIOX01   | .....                                                         | MVTICIGKVGQAKGQKIQLD                 | ..... |
| GhMIOX07   | .....                                                         | MTRIIHIGQAKGQKIQLD                   | ..... |
| GdMIOX06   | .....                                                         |                                      | ..... |
| GmMIOX06   | .....                                                         |                                      | ..... |
| GmMIOX05   | .....                                                         | MTVSVEKPNVTQAKSAEQAFP                | ..... |
| GtMIOX05   | .....                                                         | MTVSVEKPNVTQAKSAEQALPD               | ..... |
| GdMIOX05   | .....                                                         | MTVSVEKPNVTQAKSAEQAFP                | ..... |
| GaMIOX05   | .....                                                         | MTVSVEKPNVTQAKSAEQAFP                | ..... |
| GbMIOX06   | .....                                                         | MTVSVEKP...NAKSAEQAFP                | ..... |
| GhMIOX06   | .....                                                         | MTVSVEKP...NAKSAEQAFP                | ..... |
| GhMIOX12   | .....                                                         | MIVSVEKPNATQAKSAEQAFP                | ..... |
| GtMIOX11   | .....                                                         | MIVSVEKPNATQAKSAEQAFP                | ..... |
| GbMIOX12   | .....                                                         | MIVSVEKPNATQAKSAEQAFP                | ..... |
| GrMIOX03   | .....                                                         | MIVSVEKPNATQAKSAEQAFP                | ..... |
| GherMIOX06 | .....                                                         | MTVSVEKPNVTQAKSAEQAFP                | ..... |
| GdMIOX11   | .....                                                         |                                      | ..... |
| GmMIOX11   | .....                                                         |                                      | ..... |
| GkkMIOX05  | .....                                                         |                                      | ..... |
| ATMIOX03   | ..                                                            | MTISVEKPIFEVVSFAFEKSGDNIGELKLDGGFSMP | ..... |
| ATMIOX04   | ..                                                            | MNISVENPVFVHEDSTTQKTG...ELRLSDIPMS   | ..... |
| GaMIOX03   | ..                                                            | MTILIEKP...ELDCQIHVDE.SKELVLDGGFP    | ..... |
| GdMIOX03   | ..                                                            | MTILIEKP...ELDCQIHVDE.SKELVLDGGFP    | ..... |
| GherMIOX03 | ..                                                            | MTILIEKP...ELDCQIHVDE.SKELVLDGGFP    | ..... |
| GbMIOX03   | ..                                                            | MTILIEKPELVSQSDCQIHVDE.SKELVLDGGFP   | ..... |
| GtMIOX03   | ..                                                            | MTILIEKPELVSQSDCQIHVDE.SKELVLDGGFP   | ..... |
| GhMIOX03   | ..                                                            | MTILIEKPELVSQSDCQIHVDE.SKELVLDGGFP   | ..... |
| GmMIOX03   | ..                                                            | MTILIEKPELVSQSDCQIHVDE.SKELVLDGGFP   | ..... |
| GkkMIOX03  | ..                                                            | MTILIEKPELVFQPDQCNHVDE.SKELVLDGGFP   | ..... |
| GtMIOX08   | ..                                                            | MTILMEKPELVSQSDCQNHVDE.SKELVLDGGFP   | ..... |
| GbMIOX09   | ..                                                            | MTILMEKPELVSQSDCQNHVDE.SKELVLDGGFP   | ..... |
| GdMIOX08   | ..                                                            | MTILMEKPELVSQSDCQNHVDE.SKELVLDGGFP   | ..... |
| GhMIOX09   | ..                                                            | MTILMEKPELVSQSDCQNHVDE.SKELVLDGGFP   | ..... |
| GrMIOX05   | ..                                                            | MTILMEKPELVSQSDQNHVDE.SKELVLDGGFP    | ..... |
| GmMIOX08   | .....                                                         |                                      | ..... |
| ATMIOX02   | ..                                                            | MTILVEHFVPDSRVDEKVKVIEERDNELVLDGGFV  | ..... |
| GherMIOX04 | .....                                                         | MTILIDQPDFGIEAGFNKADDV               | ..... |
| GhMIOX04   | .....                                                         | MTILIDQPDFGIEAGFNKADDV               | ..... |
| GaMIOX04   | .....                                                         | MTILIDQPDFGIEAGFNKADDV               | ..... |
| GbMIOX04   | .....                                                         | MTILIDQPDFGIEAGFNKADDV               | ..... |
| GtMIOX04   | .....                                                         | MTILIDQPDFGIEAGFNKADDV               | ..... |
| GmMIOX04   | .....                                                         | MTILIDQPDFGIEAGFNKADDV               | ..... |
| GdMIOX09   | .....                                                         | MTILIDQPDFGIEAGFNKADDV               | ..... |
| GtMIOX09   | .....                                                         | MTILIDQPDFGIEAGFNKADDV               | ..... |
| GbMIOX10   | .....                                                         | MTILIDQPDFGIEAGFNKADDV               | ..... |
| GhMIOX10   | .....                                                         | MTILIDQLDFGIEAGFNKADDV               | ..... |
| GmMIOX09   | .....                                                         | MTILIDQPDFGIEAGFNKADDV               | ..... |
| GrMIOX06   | .....                                                         | MTILIDQPDFGIEAGFNKADDV               | ..... |
| GdMIOX04   | .....                                                         |                                      | ..... |
| GkkMIOX04  | .....                                                         |                                      | ..... |
| GhMIOX02   | .....                                                         | MTILIDQPELGEAGVNKLDNA                | ..... |
| GtMIOX02   | .....                                                         | MTILIDQPELGEAGVNKLDNA                | ..... |
| GbMIOX02   | .....                                                         | MTILIDQPELGEAGVNKLDNA                | ..... |
| GmMIOX02   | .....                                                         | MTILIDQPELGEAGVNKLDNA                | ..... |
| GaMIOX02   | .....                                                         | MTILIDQPELGEAGVNKLDNA                | ..... |
| GhMIOX08   | .....                                                         | MTILIDQPELGEAGVNKLDNA                | ..... |
| GrMIOX04   | .....                                                         | MTILIDQPELGEAGVNKLDNA                | ..... |
| GbMIOX08   | .....                                                         | MTILIDQPELGEAGVNKLDNA                | ..... |
| GdMIOX07   | .....                                                         | MTILIDQPELGEAGVNKLDNA                | ..... |
| GtMIOX07   | .....                                                         | MTILIDQPELGEAGVNKLDNA                | ..... |
| GmMIOX07   | .....                                                         | MTILIDQPELGEAGVNKLDNA                | ..... |
| GherMIOX02 | .....                                                         | MTILIDQPELGEAGVNKLDNA                | ..... |
| GkkMIOX02  | .....                                                         |                                      | ..... |
| GdMIOX02   | .....                                                         |                                      | ..... |
| ATMIOX01   | .....                                                         | MTILIDRHSQNDAGDEIVEKNQNGKEE          | ..... |
| GaMIOX06   | .....                                                         | DFEAGIEERHKVAVDE                     | ..... |
| GhMIOX05   | GVHFFDTFCCLYYDSFFFFDIEAGIEERHKVAVDE                           |                                      | ..... |
| GbMIOX11   | .....                                                         |                                      | ..... |
| GdMIOX10   | .....                                                         | DFEAGIEERHKVAIDE                     | ..... |
| GtMIOX10   | .....                                                         | DFEAGIEERHKVAIDE                     | ..... |
| GrMIOX02   | .....                                                         | DFEAGIEERHKVAIDE                     | ..... |
| GhMIOX11   | .....                                                         | DFEAGIEERHKVAIDE                     | ..... |
| GmMIOX10   | .....                                                         | DIEAGIEERHKVATDE                     | ..... |
| GbMIOX05   | .....                                                         |                                      | ..... |
| GherMIOX05 | SLFAALGFLLYGGRLFMLLQRFPPVESKGRRKKLQEVGYVTTICFLCFLVRCIMMCFNAFD |                                      | ..... |
| GkkMIOX06  | .....                                                         |                                      | ..... |

|            | 30                     | 40               | 50                 |
|------------|------------------------|------------------|--------------------|
| GdMIOX01   | ANELVSNDE              | FALPENNA         | FGN...SFRDYEADNGR  |
| GtMIOX01   | ANELVSNDE              | FALPENNA         | FGN...SFRDYEADNGR  |
| GbMIOX01   | ANELVSNDE              | FALPENNA         | FGN...SFRDYEADNGR  |
| GaMIOX01   | ANELVSNDE              | FALPENNA         | FGN...SFRDYEADNGR  |
| GkkMIOX01  | ANELVSNDE              | FALPENNA         | FGN...SFRDYEADNGR  |
| GhMIOX01   | ANELVSNDE              | FALPENNA         | FGN...SFRDYEADNGR  |
| GmMIOX01   | ANELVSNDE              | FALPENNA         | FGN...SFRDYEADNGR  |
| GherMIOX01 | ANELVSNDE              | FALPENNA         | FGN...SFRDYEADNGR  |
| GbMIOX07   | ANELVSNDE              | FALPENNA         | FGN...SFRDYETDNGR  |
| GtMIOX06   | ANELVSNDE              | FALPENNA         | FGN...SFRDYETDNGR  |
| GrMIOX01   | ANELVSNDE              | FALPENNA         | FGN...SFRDYETDNGR  |
| GhMIOX07   | ANELVSNDE              | FALPENNA         | FGN...SFRDYETDNGR  |
| GdMIOX06   | ANELVSNDE              | FALPENNA         | FGN...SFRDYETDNGR  |
| GmMIOX06   | ANELVSNDE              | FALPENNA         | FGN...SFRDYETDNGR  |
| GtMIOX05   | ANKLVSNDE              | FALPENNA         | FGN...TFRDYEVGAR   |
| GdMIOX05   | ANKLVSNDE              | FALPENNA         | FGN...TFRDYEVGAR   |
| GaMIOX05   | ANKLVSNDE              | FALPENNA         | FGN...TFRDYEVGAR   |
| GbMIOX06   | ANKLVSNDE              | FALPENNA         | FGN...TFRDYEVGAR   |
| GhMIOX06   | ANKLVSNDE              | FALPENNA         | FGN...TFRDYEVGAR   |
| GhMIOX12   | ANKLVSNDE              | FALPENNA         | FGN...TFRDYEVGAR   |
| GtMIOX11   | ANKLVSNDE              | FALPENNA         | FGN...TFRDYEVGAR   |
| GbMIOX12   | ANKLVSNDE              | FALPENNA         | FGN...TFRDYEVGAR   |
| GrMIOX03   | ANKLVSNDE              | FALPENNA         | FGN...KFRDYEVGAR   |
| GherMIOX06 | ANKLVSNDE              | FALPENNA         | FGN...TFRDYEVGAR   |
| GdMIOX11   | ANKLVSNDE              | FALPENNA         | FGN...TFRDYEVGAR   |
| GmMIOX11   | ANKLVSNDE              | FALPENNA         | FGN...TFRDYEVGAR   |
| GkkMIOX05  | ANKLVSNDE              | FALPENNA         | FGN...TFRDYEVGAR   |
| ATMIOX03   | KMDTNDDEA              | FALPEMNA         | FGN...QFRDYDVE     |
| ATMIOX04   | KISS                   | DDVEFLAPEMNA     | FGN...QFRDYTDNSE   |
| GaMIOX03   | VPKLSGEG               | FLAPEVNS         | FGN...SFRDYN       |
| GdMIOX03   | VPKLSGEG               | FLAPEVNS         | FGN...SFRDYN       |
| GherMIOX03 | VPKLSGEG               | FLAPEVNS         | FGN...SFRDYN       |
| GbMIOX03   | VPKLSGEG               | FLAPEVNS         | FGN...SFRDYN       |
| GtMIOX03   | VPKLSGEG               | FLAPEVNS         | FGN...SFRDYN       |
| GhMIOX03   | VPKLSGEG               | FLAPEVNS         | FGN...SFRDYN       |
| GmMIOX03   | VPKLSGEG               | FLAPEVNS         | FGN...SFRDYN       |
| GkkMIOX03  | VPKLSGEG               | FLAPEVNS         | FGN...SFRDYN       |
| GtMIOX08   | VPKLSGEG               | FLAPEVNS         | FGN...SFRDYN       |
| GbMIOX09   | VPKLSGEG               | FLAPEVNS         | FGN...SFRDYN       |
| GdMIOX08   | VPKLSGEG               | FLAPEVNS         | FGN...SFRDYN       |
| GhMIOX09   | VPKLSGEG               | FLAPEVNS         | FGN...SFRDYN       |
| GrMIOX05   | VPKLSGEG               | FLAPEVNS         | FGN...SFRDYN       |
| GmMIOX08   | VPKLSGEG               | FLAPEVNS         | FGN...SFRDYN       |
| ATMIOX02   | VPKSKETDA              | FALPEMNA         | FGN...SFRDYENGESER |
| GherMIOX04 | EKEGVLNGG              | FALPEMNA         | FGN...FRDYHVESE    |
| GhMIOX04   | EKEGVLNGG              | FALPEMNA         | FGN...FRDYHVESE    |
| GaMIOX04   | EKEGVLNGG              | FALPEMNA         | FGN...FRDYHVESE    |
| GbMIOX04   | EKEGVLNGG              | FALPEMNA         | FGN...FRDYHVESE    |
| GtMIOX04   | EKEGVLNGG              | FALPEMNA         | FGN...FRDYHVESE    |
| GmMIOX04   | EKEGVLNGG              | FALPEMNA         | FGN...FRDYHVESE    |
| GdMIOX09   | EKEAVLNGG              | FALPEMNA         | FGN...FRDYHVESE    |
| GtMIOX09   | EKEAVLNGG              | FALPEMNA         | FGN...FRDYHVESE    |
| GbMIOX10   | EKEAVLNGG              | FALPEMNA         | FGN...FRDYHVESE    |
| GhMIOX10   | EKEAVLNGG              | FALPEMNA         | FGN...FRDYHVESE    |
| GmMIOX09   | EKEAVLNGG              | FALPEMNA         | FGN...FRDYHVESE    |
| GrMIOX06   | EKEGVLHGG              | FALPEMNA         | FGN...FRDYHVESE    |
| GdMIOX04   | EKEGVLHGG              | FALPEMNA         | FGN...FRDYHVESE    |
| GkkMIOX04  | EKEGVLHGG              | FALPEMNA         | FGN...FRDYHVESE    |
| GhMIOX02   | DNELVLDGG              | FALPEMNA         | FGN...FRDYHVESE    |
| GtMIOX02   | DNELVLDGG              | FALPEMNA         | FGN...FRDYHVESE    |
| GbMIOX02   | DNELVLDGG              | FALPEMNA         | FGN...FRDYHVESE    |
| GmMIOX02   | DNELVLDGG              | FALPEMNA         | FGN...FRDYHVESE    |
| GaMIOX02   | DNELVLDGG              | FALPEMNA         | FGN...FRDYHVESE    |
| GhMIOX08   | DNELVLDGG              | FALPEMNA         | FGN...FRDYHVESE    |
| GrMIOX04   | DNELVLDGG              | FALPEMNA         | FGN...FRDYHVESE    |
| GbMIOX08   | DNELVLDGG              | FALPEMNA         | FGN...FRDYHVESE    |
| GdMIOX07   | DNELVLDGG              | FALPEMNA         | FGN...FRDYHVESE    |
| GtMIOX07   | DNELVLDGG              | FALPEMNA         | FGN...FRDYHVESE    |
| GmMIOX07   | DNELVLDGG              | FALPEMNA         | FGN...FRDYHVESE    |
| GherMIOX02 | DNELVLDGG              | FALPEMNA         | FGN...FRDYHVESE    |
| GkkMIOX02  | DNELVLDGG              | FALPEMNA         | FGN...FRDYHVESE    |
| GdMIOX02   | DNELVLDGG              | FALPEMNA         | FGN...FRDYHVESE    |
| ATMIOX01   | ETELVLDAG              | FALPEMNA         | FGN...FRDYDAESE    |
| GaMIOX06   | NELKTSDDG              | FALPEMNA         | FGN...NFR          |
| GhMIOX05   | NELKTSDDG              | FALPEMNA         | FGN...NFR          |
| GbMIOX11   | NELKTSDDG              | FALPEMNA         | FGN...NFR          |
| GdMIOX10   | NELKTSDDG              | FALPEMNA         | FGN...NFR          |
| GtMIOX10   | NELKTSDDG              | FALPEMNA         | FGN...NFR          |
| GrMIOX02   | NELKTFDGG              | FALPEMNA         | FGN...NFR          |
| GhMIOX11   | NELKTSDDG              | FALPEMNA         | FGN...NFR          |
| GmMIOX10   | NELKTSDDG              | FALPEMNA         | FGN...NFR          |
| GbMIOX05   | NELKTSDDG              | FALPEMNA         | FGN...NFR          |
| GherMIOX05 | KAADLDVNLNHPVNLNIYLLVE | ILPSSLVLFILRKLPP | ...KREIIMWRKAKGRE  |
| GkkMIOX06  | KAADLDVNLNHPVNLNIYLLVE | ILPSSLVLFILRKLPP | ...KREIIMWRKAKGRE  |





|            | 180  | 190   | 200   | 210   | 220   |        |        |        |       |       |       |       |       |       |       |       |
|------------|------|-------|-------|-------|-------|--------|--------|--------|-------|-------|-------|-------|-------|-------|-------|-------|
| GdMIOX01   | KENP | DFNN  | NP    | KYNTR | NGVY  | IEGCGL | D      | NVLM   | SWG   | HDDY  | MYM   | VAKEN | G     | T     |       |       |
| GtMIOX01   | KENP | DFNN  | NP    | KYNTR | NGVY  | IEGCGL | D      | NVLM   | SWG   | HDDY  | MYM   | MAD   | KEN   | G     | T     |       |
| GbMIOX01   | KENP | DFNN  | NP    | KYNTR | NGVY  | IEGCGL | D      | NVLM   | SWG   | HDDY  | MYM   | VAKEN | G     | T     |       |       |
| GaMIOX01   | KENP | DFNN  | NP    | KYNTR | NGVY  | IEGCGL | D      | NVLM   | SWG   | HDDY  | MYM   | VAKEN | G     | T     |       |       |
| GkkMIOX01  | KGNP | DFNN  | NP    | KYNTR | NGVY  | MEGCGL | D      | NVLM   | SWG   | HDDY  | MYM   | VAKEN | G     | T     |       |       |
| GhMIOX01   | KENP | DFNN  | NP    | KYNTR | NGVY  | IEGCGL | D      | NVLM   | SWG   | HDDY  | MYM   | VAKEN | G     | T     |       |       |
| GmMIOX01   | KENP | DFNN  | NP    | KYNTR | NGVY  | IEGCGL | D      | NVLM   | SWG   | HDDY  | MYM   | VAKEN | G     | T     |       |       |
| GherMIOX01 | KENP | DFNN  | NP    | KYNTR | NGVY  | IEGCGL | D      | NVLM   | SWG   | HDDY  | MYM   | VAKEN | G     | T     |       |       |
| GbMIOX07   | KENP | DFNN  | NP    | KHNT  | RNGVY | IEGCGL | D      | NVLM   | SWG   | HDDY  | MYM   | VAKEN | G     | T     |       |       |
| GtMIOX06   | KENP | DFNN  | NP    | KHNT  | RNGVY | IEGCGL | D      | NVLM   | SWG   | HDDY  | MYM   | VAKEN | G     | T     |       |       |
| GzMIOX01   | KENP | DFNN  | NP    | KYNTR | NGVY  | IEGCGL | D      | NVLM   | SWG   | HDDY  | MYM   | VAKEN | G     | T     |       |       |
| GhMIOX07   | KENP | DFNN  | NP    | KHNT  | RNGVY | IEGCGL | D      | NVLM   | SWG   | HDDY  | MYM   | VAKEN | G     | T     |       |       |
| GdMIOX06   | KENP | DFNN  | NP    | KHNT  | RNGVY | IEGCGL | D      | NVLM   | SWG   | HDDY  | MYM   | VAKEN | G     | T     |       |       |
| GmMIOX06   | KENP | DFNN  | NP    | KHNT  | RNGVY | IEGCGL | D      | NVLM   | SWG   | HDDY  | MYM   | VAKEN | G     | T     |       |       |
| GmMIOX05   | KENP | DFNN  | NP    | KYNT  | NNGVY | SEGCGL | D      | NLLM   | SWG   | HDDY  | MYM   | VAKEN | G     | T     |       |       |
| GtMIOX05   | KENP | DFNN  | NP    | KYNT  | NNGVY | SEGCGL | D      | NLLM   | SWG   | HDDY  | MYM   | VAKEN | G     | T     |       |       |
| GdMIOX05   | KENP | DFNN  | NP    | KYNT  | NNGVY | SEGCGL | D      | NLLM   | SWG   | HDDY  | MYM   | VAKEN | G     | T     |       |       |
| GaMIOX05   | KENP | DFNN  | NP    | KYNT  | NNGVY | SEGCGL | D      | NLLM   | SWG   | HDDY  | MYM   | VAKEN | G     | T     |       |       |
| GbMIOX06   | KENP | DFNN  | NP    | KYNT  | NNGVY | SEGCGL | D      | NLLM   | SWG   | HDDY  | MYM   | VAKEN | G     | T     |       |       |
| GhMIOX06   | KENP | DFNN  | NP    | KYNT  | NNGVY | SEGCGL | D      | NLLM   | SWG   | HDDY  | MYM   | VAKEN | G     | T     |       |       |
| RhMIOX12   | RENP | DFNN  | NP    | KYNT  | NNGVY | SEGCGL | D      | NLLM   | SWG   | HDDY  | MYM   | VAKEN | G     | T     |       |       |
| GtMIOX11   | REN  | DFNN  | NP    | KYNT  | NNGVY | SEGCGL | D      | NLLM   | SWG   | HDDY  | MYM   | VAKEN | G     | T     |       |       |
| GbMIOX12   | REN  | DFNN  | NP    | KYNT  | NNGVY | SEGCGL | D      | NLLM   | SWG   | HDDY  | MYM   | VAKEN | G     | T     |       |       |
| GzMIOX03   | REN  | DFNN  | NP    | KYNT  | NNGVY | SEGCGL | D      | NLLM   | SWG   | HDDY  | MYM   | VAKEN | G     | T     |       |       |
| GherMIOX06 | REN  | DFNN  | NP    | KYNT  | NNGVY | SEGCGL | D      | NLLM   | SWG   | HDDY  | MYM   | VAKEN | G     | T     |       |       |
| GdMIOX11   | REN  | DFNN  | NP    | KYNT  | NNGVY | SEGCGL | D      | NLLM   | SWG   | HDDY  | MYM   | VAKEN | G     | T     |       |       |
| GmMIOX11   | REN  | DFNN  | NP    | KYNT  | NNGVY | SEGCGL | D      | NLLM   | SWG   | HDDY  | MYM   | VAKEN | G     | T     |       |       |
| GkkMIOX05  | KENP | DFNN  | NP    | KYNT  | NNGVY | SEGCGL | D      | NLLM   | SWG   | HDDY  | MYM   | VAKEN | G     | T     |       |       |
| ATMIOX03   | VENP | DFNN  | NP    | KYNT  | NNGVY | SEGCGL | D      | NLLM   | SWG   | HDDY  | MYM   | VAKEN | G     | T     |       |       |
| ATMIOX04   | MENP | DFNN  | NP    | KYNT  | KA    | GIY    | SEGCGL | E      | NVLM  | SWG   | HDDY  | MYL   | VAKEN | G     | S     |       |
| GaMIOX03   | KENP | DFNN  | NP    | SYNT  | KN    | GIY    | WDGCGL | D      | NVT   | I     | SWG   | HDDY  | MYL   | VAKEN | G     | T     |
| GdMIOX03   | KENP | DFNN  | NP    | SYNT  | KN    | GIY    | WDGCGL | D      | NVT   | I     | SWG   | HDDY  | MYL   | VAKEN | G     | T     |
| GherMIOX03 | KENP | DFNN  | NP    | SYNT  | KN    | GIY    | WDGCGL | D      | NVT   | I     | SWG   | HDDY  | MYL   | VAKEN | G     | T     |
| GbMIOX03   | KENP | DFNN  | NP    | SYNT  | KN    | GIY    | WDGCGL | D      | NVT   | I     | SWG   | HDDY  | MYL   | VAKEN | G     | T     |
| GtMIOX03   | KENP | DFNN  | NP    | SYNT  | KN    | GIY    | WDGCGL | D      | NVT   | I     | SWG   | HDDY  | MYL   | VAKEN | G     | T     |
| GhMIOX03   | KENP | DFNN  | NP    | SYNT  | KN    | GIY    | WDGCGL | D      | NVT   | I     | SWG   | HDDY  | MYL   | VAKEN | G     | T     |
| GmMIOX03   | KENP | DFNN  | NP    | SYNT  | KN    | GIY    | WDGCGL | D      | NVT   | I     | SWG   | HDDY  | MYL   | VAKEN | G     | T     |
| GkkMIOX03  | KENP | DFNN  | NP    | SYNT  | KN    | GIY    | WDGCGL | D      | NVT   | I     | SWG   | HDDY  | MYL   | VAKEN | G     | T     |
| GtMIOX08   | KENP | DFNN  | NP    | SYNT  | KN    | GIY    | WDGCGL | D      | NVT   | I     | SWG   | HDDY  | MYL   | VAKEN | G     | T     |
| GbMIOX09   | KENP | DFNN  | NP    | SYNT  | KN    | GIY    | WDGCGL | D      | NVT   | I     | SWG   | HDDY  | MYL   | VAKEN | G     | T     |
| GdMIOX08   | KENP | DFNN  | NP    | SYNT  | KN    | GIY    | WDGCGL | D      | NVT   | I     | SWG   | HDDY  | MYL   | VAKEN | G     | T     |
| GhMIOX09   | KENP | DFNN  | NP    | SYNT  | KN    | GIY    | WDGCGL | D      | NVT   | I     | SWG   | HDDY  | MYL   | VAKEN | G     | T     |
| GzMIOX05   | KENP | DFNN  | NP    | SYNT  | KN    | GIY    | WDGCGL | D      | NVT   | I     | SWG   | HDDY  | MYL   | VAKEN | G     | T     |
| GmMIOX08   | KENP | DFNN  | NP    | SYNT  | KN    | GIY    | WDGCGL | D      | NVT   | I     | SWG   | HDDY  | MYL   | VAKEN | G     | T     |
| ATMIOX02   | KGNH | DI    | NNP   | KYNT  | KN    | GVY    | TEGCGL | D      | NVLM  | SWG   | HDDY  | MYL   | VAK   | KN    | G     | T     |
| GherMIOX04 | EENP | DY    | HNP   | AYNT  | KY    | GVY    | SEGCGL | N      | NVMM  | SWG   | HDDY  | MYL   | VAKEN | N     | T     |       |
| GhMIOX04   | EENP | DY    | HNP   | AYNT  | KY    | GVY    | SEGCGL | N      | NVMM  | SWG   | HDDY  | MYL   | VAKEN | N     | T     |       |
| GaMIOX04   | EENP | DY    | HNP   | AYNT  | KY    | GVY    | SEGCGL | N      | NVMM  | SWG   | HDDY  | MYL   | VAKEN | N     | T     |       |
| GbMIOX04   | EENP | DY    | HNP   | AYNT  | KY    | GVY    | SEGCGL | N      | NVMM  | SWG   | HDDY  | MYL   | VAKEN | N     | T     |       |
| GtMIOX04   | EENP | DY    | HNP   | AYNT  | KY    | GVY    | SEGCGL | N      | NVMM  | SWG   | HDDY  | MYL   | VAKEN | N     | T     |       |
| GmMIOX04   | EENP | DY    | HNP   | AYNT  | KY    | GVY    | SEGCGL | N      | NVMM  | SWG   | HDDY  | MYL   | VAKEN | N     | T     |       |
| GdMIOX09   | EENP | DY    | HNP   | AYNT  | KY    | GVY    | SEGCGL | N      | NVMM  | SWG   | HDDY  | MYL   | VAKEN | N     | T     |       |
| GtMIOX09   | EENP | DY    | HNP   | AYNT  | KY    | GVY    | SEGCGL | N      | NVMM  | SWG   | HDDY  | MYL   | VAKEN | N     | T     |       |
| GbMIOX10   | EENP | DY    | HNP   | AYNT  | KY    | GVY    | SEGCGL | N      | NVMM  | SWG   | HDDY  | MYL   | VAKEN | N     | T     |       |
| GhMIOX10   | EENP | DF    | HNP   | AYNT  | KY    | GVY    | SEGCGL | N      | NVMM  | SWG   | HDDY  | MYL   | VAKEN | N     | T     |       |
| GmMIOX09   | EENP | DY    | HNP   | AYNT  | KY    | GVY    | SEGCGL | N      | NVMM  | SWG   | HDDY  | MYL   | VAKEN | N     | T     |       |
| GzMIOX06   | EENP | DY    | HNP   | AYNT  | KY    | GVY    | SEGCGL | N      | NVMM  | SWG   | HDDY  | MYL   | VAKEN | N     | T     |       |
| GdMIOX04   | EENP | DY    | HNP   | AYNT  | KY    | GVY    | SEGCGL | N      | NVMM  | SWG   | HDDY  | MYL   | VAKEN | N     | T     |       |
| GkkMIOX04  | EENP | DY    | HNP   | AYNT  | KY    | GVY    | SEGCGL | N      | NVLM  | SWG   | HDDY  | MYL   | VAKEN | N     | T     |       |
| GhMIOX02   | EENP | DY    | HNS   | DYNT  | KY    | GVY    | SEGCGL | N      | NVMM  | SWG   | HDDY  | MYL   | V     | KG    | N     | T     |
| GtMIOX02   | EENP | DY    | HNS   | DYNT  | KY    | GVY    | SEGCGL | N      | NVMM  | SWG   | HDDY  | MYL   | V     | KG    | N     | T     |
| GbMIOX02   | EENP | DY    | HNS   | DYNT  | KY    | GVY    | SEGCGL | N      | NVMM  | SWG   | HDDY  | MYL   | V     | KG    | N     | T     |
| GmMIOX02   | EENP | DY    | HNS   | DYNT  | KY    | GVY    | SEGCGL | N      | NVMM  | SWG   | HDDY  | MYL   | V     | KG    | N     | T     |
| GaMIOX02   | EENP | DY    | HNS   | DYNT  | KY    | GVY    | SEGCGL | N      | NVMM  | SWG   | HDDY  | MYL   | V     | KG    | N     | T     |
| GhMIOX08   | YSF  | SSV   | GEQR  | ..... | ..... | .....  | .....  | .....  | ..... | ..... | ..... | ..... | ..... | ..... | ..... | ..... |
| GzMIOX04   | EENP | DY    | HNS   | DYNT  | KY    | GVY    | SEGCGL | N      | NVMM  | SWG   | HDDY  | MYL   | V     | KG    | N     | T     |
| GbMIOX08   | EENP | DY    | HNS   | DYNT  | KY    | GVY    | SEGCGL | N      | NVMM  | SWG   | HDDY  | MYL   | V     | KG    | N     | T     |
| GdMIOX07   | EENP | DY    | HNS   | DYNT  | KY    | GVY    | SEGCGL | N      | NVMM  | SWG   | HDDY  | MYL   | V     | KG    | N     | T     |
| GtMIOX07   | EENP | DY    | HNS   | DYNT  | KY    | GVY    | SEGCGL | N      | NVMM  | SWG   | HDDY  | MYL   | V     | KG    | N     | T     |
| GmMIOX07   | EENP | DY    | HNS   | DYNT  | KY    | GVY    | SEGCGL | N      | NVMM  | SWG   | HDDY  | MYL   | V     | KG    | N     | T     |
| GherMIOX02 | EENL | DY    | HNS   | DYNT  | KY    | GVY    | SEGCGL | N      | NVMM  | SWG   | HDDY  | MYL   | V     | KG    | N     | T     |
| GkkMIOX02  | EENP | DY    | HNS   | DYNT  | KY    | GVY    | SEGCGL | N      | NVMM  | SWG   | HDDY  | MYL   | V     | KG    | N     | T     |
| GdMIOX02   | EENP | DY    | HNS   | DYNT  | KY    | GVY    | SEGCGL | N      | NVMM  | SWG   | HDDY  | MYL   | V     | KG    | N     | T     |
| ATMIOX01   | KENP | DY    | DN    | NP    | AYNT  | KY     | GIY    | TEGCGL | D     | NVLM  | SWG   | HDDY  | MYL   | VAKEN | Q     | T     |
| GaMIOX06   | QENL | DN    | KNP   | AYNT  | KY    | GIY    | SEGFGL | H      | NVLM  | SWG   | HDDY  | MYL   | LL    | HF    | Q     | PH    |
| GhMIOX05   | TH   | ..... | ..... | ..... | ..... | .....  | .....  | .....  | ..... | ..... | ..... | ..... | ..... | ..... | ..... | ..... |
| GbMIOX11   | TKS  | ..... | ..... | ..... | ..... | .....  | .....  | .....  | ..... | ..... | ..... | ..... | ..... | ..... | ..... | ..... |
| GdMIOX10   | QENP | DN    | KNP   | AYNT  | KY    | GIY    | SEGCGL | H      | NVLM  | SWG   | HDDY  | MYL   | LF    | ..... | RCG   | ..... |
| GtMIOX10   | QENP | DN    | KNP   | AYNT  | KY    | GIY    | SEGCGL | H      | NVLM  | SWG   | HDDY  | MYL   | LF    | ..... | RCG   | ..... |
| GzMIOX02   | QENP | DN    | KNP   | AYNT  | KY    | GIY    | SEGCGL | H      | NVLM  | SWG   | HDDY  | MYL   | V     | ..... | HF    | Q     |
| GhMIOX11   | ENP  | DN    | KNP   | AYNT  | KY    | GIY    | SEGCGL | H      | NVLM  | SWG   | HDDY  | MYL   | LS    | NI    | SI    | ..... |
| GmMIOX10   | ENP  | DN    | KNP   | AYNT  | KY    | GIY    | SEGCGL | H      | NVLM  | SWG   | HDDY  | MYL   | CG    | ..... | ..... | ..... |
| GbMIOX05   | QENL | DN    | KNP   | AYNN  | LL    | .....  | .....  | .....  | ..... | ..... | ..... | ..... | ..... | ..... | ..... | ..... |
| GherMIOX05 | QENL | DN    | KNP   | AYNT  | KY    | GIY    | SEGFGL | H      | NVLM  | SWG   | HDDY  | MYL   | LL    | HF    | Q     | PH    |
| GkkMIOX06  | QENP | DN    | KNP   | AYNT  | KY    | GIY    | SEGCGL | H      | NVMM  | SWG   | HDDY  | MYL   | V     | ..... | EN    | KS    |



|            |          |             |                              |                                        |
|------------|----------|-------------|------------------------------|----------------------------------------|
| GdMIOX01   | TLPSA    | GLFIVRYHSFY |                              |                                        |
| GtMIOX01   | TLPSA    | GLFIVRYHSFY |                              |                                        |
| GbMIOX01   | TLPSA    | GLFIVRYHSFY |                              |                                        |
| GaMIOX01   | TLPSA    | GLFIVRYHSFY |                              |                                        |
| GkkMIOX01  | TLPSA    | GLFIIRYHSFY |                              |                                        |
| GhMIOX01   | TLPSA    | GLFIVRYHSFY |                              |                                        |
| GmMIOX01   | TLPSA    | GLFIVRYHSFY |                              |                                        |
| GherMIOX01 | TLPSA    | GLFIVRYHSFY |                              |                                        |
| GbMIOX07   | TLPSA    | GLFIVRYHSFY |                              |                                        |
| GtMIOX06   | TLPSA    | GLFIVRYHSFY |                              |                                        |
| GrMIOX01   | TLPSA    | GLFIVRYHSFY |                              |                                        |
| GhMIOX07   | TLPSA    | GLFIVRYHSFY |                              |                                        |
| GdMIOX06   | TLPSA    | GLFIVRYHSFY | RKHFFPYRCCFVSKYHNPFYLISTYLIA |                                        |
| GmMIOX06   | TLPSA    | GLFIVRYHSFY |                              |                                        |
| GmMIOX05   | TLPQA    | GLFIIRYHSFY | P                            |                                        |
| GtMIOX05   | TLPQA    | GLFIIRYHSFY | P                            |                                        |
| GdMIOX05   | TLPQA    | GLFIIRYHSFY | P                            |                                        |
| GaMIOX05   | TLPQA    | GLFIIRYHSFY | P                            |                                        |
| GbMIOX06   | TLPQA    | GLFIIRYHSFY | P                            |                                        |
| GhMIOX06   | TLPQA    | GLFIIRYHSFY | P                            |                                        |
| GhMIOX12   | TLPQA    | GLFIIRYHSFY | P                            |                                        |
| GtMIOX11   | TLPQA    | GLFIIRYHSFY | P                            |                                        |
| GbMIOX12   | TLPQA    | GLFIIRYHSFY | P                            |                                        |
| GrMIOX03   | TLPQA    | GLFIIRYHSFY | P                            |                                        |
| GherMIOX06 | TLPQA    | GLFIIRYHSFY | P                            |                                        |
| GdMIOX11   | TLPQA    | GLFIIRYHSFY | P                            |                                        |
| GmMIOX11   | TLPQA    | GLFIIRYHSFY | P                            |                                        |
| GkkMIOX05  | TLPQA    | GLFIIRYHSFY | S                            |                                        |
| ATMIOX03   | TLPSA    | GLFIIRYHSFY | P                            |                                        |
| ATMIOX04   | TLPSA    | GLFIIRYHSFY | P                            |                                        |
| GaMIOX03   | TLPSA    | GLFIIRYHSFY | P                            |                                        |
| GdMIOX03   | TLPSA    | GLFIIRYHSFY | P                            |                                        |
| GherMIOX03 | TLPSA    | GLFIIRYHSFY | P                            |                                        |
| GbMIOX03   | TLPSA    | GLFIIRYHSFY | P                            |                                        |
| GtMIOX03   | TLPSA    | GLFIIRYHSFY | P                            |                                        |
| GhMIOX03   | TLPSA    | GLFIIRYHSFY | P                            |                                        |
| GmMIOX03   | TLPSA    | GLFIIRYHSFY | P                            |                                        |
| GkkMIOX03  | TLPSA    | G           |                              |                                        |
| GtMIOX08   | TLPSA    | GLFIIRYHSFY | P                            |                                        |
| GbMIOX09   | TLPSA    | GLFIIRYHSFY | P                            |                                        |
| GdMIOX08   | TLPSA    | GLFIIRYHSFY | P                            |                                        |
| GhMIOX09   | TLPSA    | GLFIIRYHSFY | P                            |                                        |
| GrMIOX05   | TLPSA    | GLFIIRYHSFY | P                            |                                        |
| GmMIOX08   | TLPSA    | GLFIIRYHSFY | P                            |                                        |
| ATMIOX02   | TLPHA    | GLFIIRYHSFY | P                            |                                        |
| GherMIOX04 | TLPSA    | ALFIIRYHSFY | A                            |                                        |
| GhMIOX04   | TLPSA    | ALFIIRYHSFY | A                            |                                        |
| GaMIOX04   | TLPSA    | ALFIIRYHSFY | A                            |                                        |
| GbMIOX04   | TLPSA    | ALFIIRYHSFY | A                            |                                        |
| GtMIOX04   | TLPSA    | ALFIIRYHSFY | A                            |                                        |
| GmMIOX04   | TLPSA    | ALFIIRYHSFY | A                            |                                        |
| GdMIOX09   | TLPSA    | ALFIIRYHSFY | A                            |                                        |
| GtMIOX09   | TLPSA    | ALFIIRYHSFY | A                            |                                        |
| GbMIOX10   | TLPSA    | ALFIIRYHSFY | A                            |                                        |
| GhMIOX10   | TLPSA    | ALFIIRYHSFY | A                            |                                        |
| GmMIOX09   | TLPSA    | ALFIIRCHSFY | A                            |                                        |
| GrMIOX06   | TLPSA    | ALFIIRYHSFY | A                            |                                        |
| GdMIOX04   | TLPSA    | ALFIIRYHSFY | A                            |                                        |
| GkkMIOX04  | TLPPA    | ALFIIRYHSFY | A                            |                                        |
| GhMIOX02   | TLPPA    | ALFIIRYHSFY | A                            |                                        |
| GtMIOX02   | TLPPA    | ALFIIRYHSFY | A                            |                                        |
| GbMIOX02   | TLPPA    | ALFIIRYHSFY | A                            |                                        |
| GmMIOX02   | TLPPA    | ALFIIRYHSFY | A                            |                                        |
| GaMIOX02   | TLPPA    | ALFIIRYHSFY | A                            |                                        |
| GhMIOX08   |          |             |                              |                                        |
| GrMIOX04   | TLPPA    | ALFIIRYHSFY | A                            |                                        |
| GbMIOX08   | TLPPA    | ALFIIRYHSFY | A                            |                                        |
| GdMIOX07   | TLPPA    | ALFIIRYHSFY | A                            |                                        |
| GtMIOX07   | TLPPA    | ALFIIRYHSFY | A                            |                                        |
| GmMIOX07   | TLPPA    | ALFIIRYHSFY | A                            |                                        |
| GherMIOX02 | TLPPA    | ALFIIRYHSFY | A                            |                                        |
| GkkMIOX02  | TLPPA    | ALFIIRYHSFY | A                            |                                        |
| GdMIOX02   | TLPPA    | ALFIIRYHSFY | A                            |                                        |
| ATMIOX01   | TLPSA    | GLFIIRYHSFY | A                            |                                        |
| GaMIOX06   | MVVNEDKS | TFSSL       | GLFIIRYHSFY                  | A                                      |
| GhMIOX05   | MVVKEDKS | TFPSL       | GLFIIRYHSFY                  | A                                      |
| GbMIOX11   |          |             |                              |                                        |
| GdMIOX10   |          |             |                              |                                        |
| GtMIOX10   |          |             |                              |                                        |
| GrMIOX02   |          |             | LYKSXIXL                     |                                        |
| GhMIOX11   |          |             |                              | L                                      |
| GmMIOX10   |          |             |                              |                                        |
| GbMIOX05   |          |             |                              |                                        |
| GherMIOX05 | MVVNEDKS | TFPSL       | GLFIIRYHSFY                  | VNMIFTAKAKFTYMLRKSSPTIYLSSTRKLPSSHISIR |
| GkkMIOX06  |          |             |                              |                                        |

|            |                                                                |
|------------|----------------------------------------------------------------|
| GdMIOX01   | .....                                                          |
| GtMIOX01   | .....                                                          |
| GbMIOX01   | .....                                                          |
| GaMIOX01   | .....                                                          |
| GkkMIOX01  | .....                                                          |
| GhMIOX01   | .....                                                          |
| GmMIOX01   | .....                                                          |
| GherMIOX01 | .....                                                          |
| GbMIOX07   | .....                                                          |
| GtMIOX06   | .....                                                          |
| GrMIOX01   | .....                                                          |
| GhMIOX07   | .....                                                          |
| GdMIOX06   | .....                                                          |
| GmMIOX06   | .....                                                          |
| GmMIOX05   | .....                                                          |
| GtMIOX05   | .....                                                          |
| GdMIOX05   | .....                                                          |
| GaMIOX05   | .....                                                          |
| GbMIOX06   | .....                                                          |
| GhMIOX06   | .....                                                          |
| GhMIOX12   | .....                                                          |
| GtMIOX11   | .....                                                          |
| GbMIOX12   | .....                                                          |
| GrMIOX03   | .....                                                          |
| GherMIOX06 | .....                                                          |
| GdMIOX11   | .....                                                          |
| GmMIOX11   | .....                                                          |
| GkkMIOX05  | .....                                                          |
| ATMIOX03   | .....                                                          |
| ATMIOX04   | .....                                                          |
| GaMIOX03   | .....                                                          |
| GdMIOX03   | .....                                                          |
| GherMIOX03 | .....                                                          |
| GbMIOX03   | .....                                                          |
| GtMIOX03   | .....                                                          |
| GhMIOX03   | .....                                                          |
| GmMIOX03   | .....                                                          |
| GkkMIOX03  | .....                                                          |
| GtMIOX08   | .....                                                          |
| GbMIOX09   | .....                                                          |
| GdMIOX08   | .....                                                          |
| GhMIOX09   | .....                                                          |
| GrMIOX05   | .....                                                          |
| GmMIOX08   | .....                                                          |
| ATMIOX02   | .....                                                          |
| GherMIOX04 | .....                                                          |
| GhMIOX04   | .....                                                          |
| GaMIOX04   | .....                                                          |
| GbMIOX04   | .....                                                          |
| GtMIOX04   | .....                                                          |
| GmMIOX04   | .....                                                          |
| GdMIOX09   | .....                                                          |
| GtMIOX09   | .....                                                          |
| GbMIOX10   | .....                                                          |
| GhMIOX10   | .....                                                          |
| GmMIOX09   | .....                                                          |
| GrMIOX06   | .....                                                          |
| GdMIOX04   | .....                                                          |
| GkkMIOX04  | .....                                                          |
| GhMIOX02   | .....                                                          |
| GtMIOX02   | .....                                                          |
| GbMIOX02   | .....                                                          |
| GmMIOX02   | .....                                                          |
| GaMIOX02   | .....                                                          |
| GhMIOX08   | .....                                                          |
| GrMIOX04   | .....                                                          |
| GbMIOX08   | .....                                                          |
| GdMIOX07   | .....                                                          |
| GtMIOX07   | .....                                                          |
| GmMIOX07   | .....                                                          |
| GherMIOX02 | .....                                                          |
| GkkMIOX02  | .....                                                          |
| GdMIOX02   | .....                                                          |
| ATMIOX01   | .....                                                          |
| GaMIOX06   | .....                                                          |
| GhMIOX05   | .....                                                          |
| GbMIOX11   | .....                                                          |
| GdMIOX10   | .....                                                          |
| GtMIOX10   | .....                                                          |
| GrMIOX02   | .....                                                          |
| GhMIOX11   | .....                                                          |
| GmMIOX10   | .....                                                          |
| GbMIOX05   | .....                                                          |
| GherMIOX05 | NILTLKSIRNPFYVLNTGAKIPAIGLGTWQSGGDLCVDAVKTAF SVGYRHIDCAHLYGNEI |
| GkkMIOX06  | .....                                                          |



GdMIOX01 KLRW  
 GtMIOX01 KLRW  
 GbMIOX01 KLRW  
 GaMIOX01 KLRW  
 GkkMIOX01  
 GhMIOX01 KLRW  
 GmMIOX01 KLRW  
 GherMIOX01 KLRW  
 GbMIOX07  
 GtMIOX06 KLRW  
 GrMIOX01 KLRW  
 GhMIOX07 KLRW  
 GdMIOX06  
 GmMIOX06 KLRW  
 GmMIOX05 KLRW  
 GtMIOX05 KLRW  
 GdMIOX05 KLRW  
 GaMIOX05 KLRW  
 GbMIOX06 KLRW  
 GhMIOX06 KLRW  
 GhMIOX12 KLRW  
 GtMIOX11 KLRW  
 GbMIOX12 KLRW  
 GrMIOX03 KLRW  
 GherMIOX06 KLRW  
 GdMIOX11 KLRW  
 GmMIOX11 KLRW  
 GkkMIOX05  
 ATMIOX03 NLRW  
 ATMIOX04 NLRW  
 GaMIOX03 KLRW  
 GdMIOX03 KLRW  
 GherMIOX03 KLRW  
 GbMIOX03 KLRW  
 GtMIOX03 KLRW  
 GhMIOX03 KLRW  
 GmMIOX03 KLRW  
 GkkMIOX03  
 GtMIOX08  
 GbMIOX09 KLRW  
 GdMIOX08 KLRW  
 GhMIOX09 KLRW  
 GrMIOX05 KLRW  
 GmMIOX08 KLRW  
 ATMIOX02 KLRW  
 GherMIOX04 MAGEYPRSVLIALVIFSLVVSPMLPCVTARPPVVCPACVCCGPPPPGGACCSCGCASVQS  
 GhMIOX04 KLRW  
 GaMIOX04 KLRW  
 GbMIOX04 KLRW  
 GtMIOX04 KLRW  
 GmMIOX04 KLRW  
 GdMIOX09 KLRW  
 GtMIOX09 KLRW  
 GbMIOX10 KLRW  
 GhMIOX10 KLRW  
 GmMIOX09 KLRW  
 GrMIOX06 KLRW  
 GdMIOX04 KLRW  
 GkkMIOX04 KLRW  
 GhMIOX02 KLRW  
 GtMIOX02 KLRW  
 GbMIOX02 KLRW  
 GmMIOX02 KLRW  
 GaMIOX02 KLRW  
 GhMIOX08  
 GrMIOX04 KLRW  
 GbMIOX08 KLRW  
 GdMIOX07 KLRW  
 GtMIOX07 KLRW  
 GmMIOX07 KLRW  
 GherMIOX02 ILPGEVKMNPGFSPSRQFNASASGFF  
 GkkMIOX02 ILPGEVKMNPGLSPSRRFNASASGFV  
 GdMIOX02 KLRW  
 ATMIOX01 KLRW  
 GaMIOX06 KLNWRCGS  
 GhMIOX05 KLNWRCGS  
 GbMIOX11  
 GdMIOX10 KLRWQCGS  
 GtMIOX10 KLRWQCGS  
 GrMIOX02 KLRWQCGS  
 GhMIOX11 KLRWQCGS  
 GmMIOX10 KLRWQCGS  
 GbMIOX05  
 GherMIOX05 SSGFGDATDPPPLKSGSEHRQFLNRLKKVWKAMEGLVDSGLVRAIGVSNFGVHQIKELLF  
 GkkMIOX06

GdMIOX01 .....  
GtMIOX01 .....  
GbMIOX01 .....  
GaMIOX01 .....  
GkkMIOX01 .....  
GhMIOX01 .....  
GmMIOX01 .....  
GherMIOX01 .....  
GbMIOX07 .....  
GtMIOX06 .....  
GrMIOX01 .....  
GhMIOX07 .....  
GdMIOX06 .....  
GmMIOX06 .....  
GmMIOX05 .....  
GtMIOX05 .....  
GdMIOX05 .....  
GaMIOX05 .....  
GbMIOX06 .....  
GhMIOX06 .....  
GhMIOX12 .....  
GtMIOX11 .....  
GbMIOX12 .....  
GrMIOX03 .....  
GherMIOX06 .....  
GdMIOX11 .....  
GmMIOX11 .....  
GkkMIOX05 .....  
ATMIOX03 .....  
ATMIOX04 .....  
GaMIOX03 .....  
GdMIOX03 .....  
GherMIOX03 .....  
GbMIOX03 .....  
GtMIOX03 .....  
GhMIOX03 .....  
GmMIOX03 .....  
GkkMIOX03 .....  
GtMIOX08 .....  
GbMIOX09 .....  
GdMIOX08 .....  
GhMIOX09 .....  
GrMIOX05 .....  
GmMIOX08 .....  
ATMIOX02 .....  
GherMIOX04 PPSEMATP .....  
GhMIOX04 .....  
GaMIOX04 .....  
GbMIOX04 .....  
GtMIOX04 .....  
GmMIOX04 .....  
GdMIOX09 .....  
GtMIOX09 .....  
GbMIOX10 .....  
GhMIOX10 .....  
GmMIOX09 .....  
GrMIOX06 .....  
GdMIOX04 .....  
GkkMIOX04 .....  
GhMIOX02 .....  
GtMIOX02 .....  
GbMIOX02 .....  
GmMIOX02 .....  
GaMIOX02 .....  
GhMIOX08 .....  
GrMIOX04 .....  
GbMIOX08 .....  
GdMIOX07 .....  
GtMIOX07 .....  
GmMIOX07 .....  
GherMIOX02 .....  
GkkMIOX02 .....  
GdMIOX02 .....  
ATMIOX01 .....  
GaMIOX06 .....  
GhMIOX05 .....  
GbMIOX11 .....  
GdMIOX10 .....  
GtMIOX10 .....  
GrMIOX02 .....  
GhMIOX11 .....  
GmMIOX10 .....  
GbMIOX05 .....  
GherMIOX05 AKIVPAVNQVELHPPFWRQDELVKFCQMKGIHVS AHTPLGVPTSSPGVSDSGSGGEDEP GT .....  
GkkMIOX06 .....

GdMIOX01 .....  
GtMIOX01 .....  
GbMIOX01 .....  
GaMIOX01 .....  
GkkMIOX01 .....  
GhMIOX01 .....  
GmMIOX01 .....  
GherMIOX01 .....  
GbMIOX07 .....  
GtMIOX06 .....  
GrMIOX01 .....  
GhMIOX07 .....  
GdMIOX06 .....  
GmMIOX06 .....  
GmMIOX05 .....  
GtMIOX05 .....  
GdMIOX05 .....  
GaMIOX05 .....  
GbMIOX06 .....  
GhMIOX06 .....  
GhMIOX12 .....  
GtMIOX11 .....  
GbMIOX12 .....  
GrMIOX03 .....  
GherMIOX06 .....  
GdMIOX11 .....  
GmMIOX11 .....  
GkkMIOX05 .....  
ATMIOX03 .....  
ATMIOX04 .....  
GaMIOX03 .....  
GdMIOX03 .....  
GherMIOX03 .....  
GbMIOX03 .....  
GtMIOX03 .....  
GhMIOX03 .....  
GmMIOX03 .....  
GkkMIOX03 .....  
GtMIOX08 .....  
GbMIOX09 .....  
GdMIOX08 .....  
GhMIOX09 .....  
GrMIOX05 .....  
GmMIOX08 .....  
ATMIOX02 .....  
GherMIOX04 .....  
GhMIOX04 .....  
GaMIOX04 .....  
GbMIOX04 .....  
GtMIOX04 .....  
GmMIOX04 .....  
GdMIOX09 .....  
GtMIOX09 .....  
GbMIOX10 .....  
GhMIOX10 .....  
GmMIOX09 .....  
GrMIOX06 .....  
GdMIOX04 .....  
GkkMIOX04 .....  
GhMIOX02 .....  
GtMIOX02 .....  
GbMIOX02 .....  
GmMIOX02 .....  
GaMIOX02 .....  
GhMIOX08 .....  
GrMIOX04 .....  
GbMIOX08 .....  
GdMIOX07 .....  
GtMIOX07 .....  
GmMIOX07 .....  
GherMIOX02 .....  
GkkMIOX02 .....  
GdMIOX02 .....  
ATMIOX01 .....  
GaMIOX06 .....  
GhMIOX05 .....  
GbMIOX11 .....  
GdMIOX10 .....  
GtMIOX10 .....  
GrMIOX02 .....  
GhMIOX11 .....  
GmMIOX10 .....  
GbMIOX05 .....  
GherMIOX05 PRISFRRRSVHGPMKLSVVGEIADRHKKKTPEQVILRWGFQRGTSVLPCSLKPDRIKQN  
GkkMIOX06 .....

GdMIOX01 .....  
GtMIOX01 .....  
GbMIOX01 .....  
GaMIOX01 .....  
GkkMIOX01 .....  
GhMIOX01 .....  
GmMIOX01 .....  
GherMIOX01 .....  
GbMIOX07 .....  
GtMIOX06 .....  
GrMIOX01 .....  
GhMIOX07 .....  
GdMIOX06 .....  
GmMIOX06 .....  
GmMIOX05 .....  
GtMIOX05 .....  
GdMIOX05 .....  
GaMIOX05 .....  
GbMIOX06 .....  
GhMIOX06 .....  
GhMIOX12 .....  
GtMIOX11 .....  
GbMIOX12 .....  
GrMIOX03 .....  
GherMIOX06 .....  
GdMIOX11 .....  
GmMIOX11 .....  
GkkMIOX05 .....  
ATMIOX03 .....  
ATMIOX04 .....  
GaMIOX03 .....  
GdMIOX03 .....  
GherMIOX03 .....  
GbMIOX03 .....  
GtMIOX03 .....  
GhMIOX03 .....  
GmMIOX03 .....  
GkkMIOX03 .....  
GtMIOX08 .....  
GbMIOX09 .....  
GdMIOX08 .....  
GhMIOX09 .....  
GrMIOX05 .....  
GmMIOX08 .....  
ATMIOX02 .....  
GherMIOX04 .....  
GhMIOX04 .....  
GaMIOX04 .....  
GbMIOX04 .....  
GtMIOX04 .....  
GmMIOX04 .....  
GdMIOX09 .....  
GtMIOX09 .....  
GbMIOX10 .....  
GhMIOX10 .....  
GmMIOX09 .....  
GrMIOX06 .....  
GdMIOX04 .....  
GkkMIOX04 .....  
GhMIOX02 .....  
GtMIOX02 .....  
GbMIOX02 .....  
GmMIOX02 .....  
GaMIOX02 .....  
GhMIOX08 .....  
GrMIOX04 .....  
GbMIOX08 .....  
GdMIOX07 .....  
GtMIOX07 .....  
GmMIOX07 .....  
GherMIOX02 .....  
GkkMIOX02 .....  
GdMIOX02 .....  
ATMIOX01 .....  
GaMIOX06 .....  
GhMIOX05 .....  
GbMIOX11 .....  
GdMIOX10 .....  
GtMIOX10 .....  
GrMIOX02 .....  
GhMIOX11 .....  
GmMIOX10 .....  
GbMIOX05 .....  
GherMIOX05 IDIFNWSLSDDWNRLNRIEPQVCLYGDGPLNNLSDRGFMFGSGPLQAVREMEDDAEFNA  
GkkMIOX06 .....
